# Supplementary material
Source: publisher site journal article supplement (https://www.dovepress.com/article/409711)
Supplement: Supplementary file 1 [file get_supplementary_file.php]

**Supplementary Table 1.** Primer sequence for collected clinical tumor samples

| Genes | Sequence (5'-3') |
| --- | --- |
| FAM242C-F | TCCTTGGCCCACTCCTGTT |
| FAM242C-R | AGGCAGCTCTGTTCCTCCT |
| LINC01762-F | CATGTAGGGGCACTGGACTG |
| LINC01762-R | TGCTGCAGTATCCCCACAG |
| LINC02038-F | ACCTGTTCTTCCACGGCAG |
| LINC02038-R | TGGACCTTATCGACGGCCT |
| PVT1-F | ATCACTGTGGGAAAACGGCA |
| PVT1-R | GGTGGAGTCATGGGTGTCAG |
| GAPDH-F | GGAGCGAGATCCCTCCAAAAT |
| GAPDH-R | GGCTGTTGTCATACTTCTCATGG |
| ACTB-F | CATGTACGTTGCTATCCAGGC |
| ACTB-R | CTCCTTAATGTCACGCACGAT |

**Supplementary Table 2.** The degrees of lncRNAs in the co-expression network

| Name | Degree | Up/Down |
| --- | --- | --- |
| LINC02038 | 5 | down |
| FAM242C | 33 | down |
| LINC01762 | 220 | down |
| PVT1 | 325 | up |

**Supplementary Table 3.** Candidate drugs targeted by the key genes

| No. | Gene | Drug | Interaction types | Sources | PMIDs |
| --- | --- | --- | --- | --- | --- |
| 1 | GABRD | TRIAZOLAM | potentiator|positive modulator | TdgClinicalTrial|ChemblInteractions|TEND | 18384456|11752090 |
| 2 | GABRD | HALAZEPAM | potentiator|positive modulator | TdgClinicalTrial|ChemblInteractions|TEND | 6738302|2867566 |
| 3 | GABRD | BROMAZEPAM | potentiator | TdgClinicalTrial|TEND | 18384456 |
| 4 | GABRD | QUAZEPAM | potentiator|positive modulator | TdgClinicalTrial|ChemblInteractions|TEND | 3017690|2892106 |
| 5 | GABRD | CLOTIAZEPAM | potentiator | TdgClinicalTrial|TEND | 18855614 |
| 6 | GABRD | DIAZEPAM | positive modulator|potentiator | TdgClinicalTrial|ChemblInteractions|TEND | 18384456|11752090 |
| 7 | GABRD | OXAZEPAM | potentiator|positive modulator | TdgClinicalTrial|ChemblInteractions|TEND | 18384456|11752090 |
| 8 | GABRD | DESFLURANE | positive modulator | ChemblInteractions |  |
| 9 | GABRD | ESZOPICLONE | positive modulator | ChemblInteractions |  |
| 10 | GABRD | PENTOBARBITAL | positive modulator | ChemblInteractions |  |
| 11 | GABRD | MIDAZOLAM HYDROCHLORIDE | positive modulator | ChemblInteractions |  |
| 12 | GABRD | CHLORDIAZEPOXIDE | positive modulator | TdgClinicalTrial|ChemblInteractions|TEND |  |
| 13 | GABRD | THIAMYLAL SODIUM | positive modulator | ChemblInteractions |  |
| 14 | GABRD | ESTAZOLAM | positive modulator|potentiator | TdgClinicalTrial|ChemblInteractions|TEND | 639854|2889803 |
| 15 | GABRD | TALBUTAL | positive modulator | ChemblInteractions |  |
| 16 | GABRD | NITRAZEPAM | potentiator | TdgClinicalTrial|TEND | 18384456|11752090 |
| 17 | GABRD | FLUDIAZEPAM | potentiator | TdgClinicalTrial|TEND | 2857046 |
| 18 | GABRD | BUTABARBITAL SODIUM | positive modulator | ChemblInteractions |  |
| 19 | GABRD | ISOFLURANE | positive modulator | ChemblInteractions |  |
| 20 | GABRD | METHARBITAL | positive modulator | ChemblInteractions |  |
| 21 | GABRD | TEMAZEPAM | positive modulator|potentiator | TdgClinicalTrial|ChemblInteractions|TEND | 18384456|20138190 |
| 22 | GABRD | ALPRAZOLAM | positive modulator | TdgClinicalTrial|ChemblInteractions|TEND |  |
| 23 | GABRD | BUTALBITAL | positive modulator | ChemblInteractions |  |
| 24 | GABRD | FLURAZEPAM | potentiator | TdgClinicalTrial|TEND | 18384456|11752090 |
| 25 | GABRD | THIOPENTAL SODIUM | positive modulator | ChemblInteractions |  |
| 26 | GABRD | CLOBAZAM | positive modulator | TdgClinicalTrial|ChemblInteractions|TEND |  |
| 27 | GABRD | CLORAZEPATE DIPOTASSIUM | positive modulator | ChemblInteractions |  |
| 28 | GABRD | PF-06372865 | agonist | ChemblInteractions |  |
| 29 | GABRD | CLONAZEPAM | positive modulator | TdgClinicalTrial|ChemblInteractions|TEND |  |
| 30 | GABRD | SEVOFLURANE | positive modulator | ChemblInteractions |  |
| 31 | GABRD | CHLORDIAZEPOXIDE HYDROCHLORIDE | positive modulator | ChemblInteractions |  |
| 32 | GABRD | GABOXADOL | agonist | TTD |  |
| 33 | GABRD | METHYPRYLON | positive modulator | ChemblInteractions |  |
| 34 | GABRD | HALOTHANE | positive modulator | ChemblInteractions |  |
| 35 | GABRD | PRIMIDONE | positive modulator | ChemblInteractions |  |
| 36 | GABRD | PRAZEPAM | potentiator|positive modulator | TdgClinicalTrial|ChemblInteractions|TEND | 7773620 |
| 37 | GABRD | CINOLAZEPAM | potentiator | TdgClinicalTrial|TEND | 7849137 |
| 38 | GABRD | SECOBARBITAL SODIUM | positive modulator | ChemblInteractions |  |
| 39 | GABRD | METHOHEXITAL SODIUM | positive modulator | ChemblInteractions |  |
| 40 | GABRD | PROPOFOL | positive modulator | ChemblInteractions |  |
| 41 | GABRD | MIDAZOLAM | potentiator | TdgClinicalTrial|TEND | 18384456|11752090 |
| 42 | GABRD | MEPROBAMATE | agonist | ChemblInteractions |  |
| 43 | GABRD | ADINAZOLAM | potentiator | TdgClinicalTrial|TEND | 6148400|6320036 |
| 44 | GABRD | LORAZEPAM | positive modulator | TdgClinicalTrial|ChemblInteractions|TEND |  |
| 45 | GABRD | PENTOBARBITAL SODIUM | positive modulator | ChemblInteractions |  |
| 46 | GABRD | METHOXYFLURANE |  | ChemblInteractions |  |
| 47 | GABRD | REMIMAZOLAM |  | TdgClinicalTrial |  |
| 48 | GABRD | GANAXOLONE |  | TTD |  |
| 49 | GABRD | BREXANOLONE |  | TTD |  |
| 50 | GABRD | ETHCHLORVYNOL |  | ChemblInteractions |  |
| 51 | GABRD | TOPIRAMATE |  | ChemblInteractions |  |
| 52 | GABRD | ADIPIPLON |  | TdgClinicalTrial |  |
| 53 | GABRD | GLUTETHIMIDE |  | ChemblInteractions |  |
| 54 | GABRD | CLORAZEPIC ACID |  | TdgClinicalTrial|TEND |  |
| 55 | GABRD | ACAMPROSATE CALCIUM |  | ChemblInteractions |  |
| 56 | GABRD | TRICLOFOS SODIUM |  | ChemblInteractions |  |
| 57 | GABRD | ENFLURANE |  | ChemblInteractions |  |
| 58 | GABRD | AZIETOMIDATE |  | DTC | 16884293 |
| 59 | GABRD | FLUMAZENIL |  | ChemblInteractions |  |
| 60 | GABRD | OCINAPLON |  | TdgClinicalTrial |  |
| 61 | GABRD | ETOMIDATE |  | DTC|ChemblInteractions | 16884293 |
| 62 | CDKN2A | CARBOPLATIN |  | JAX-CKB | 28514312 |
| 63 | CDKN2A | SAPANISERTIB |  | JAX-CKB | 25261369 |
| 64 | CDKN2A | VEMURAFENIB |  | CIViC | 24265155 |
| 65 | CDKN2A | CRIZOTINIB |  | JAX-CKB | 28476735 |
| 66 | CDKN2A | DABRAFENIB |  | CIViC | 24265155 |
| 67 | CDKN2A | GEMCITABINE |  | JAX-CKB | 25156567 |
| 68 | CDKN2A | HMN-214 |  | JAX-CKB | 25156567 |
| 69 | CDKN2A | LETROZOLE |  | CIViC | 26715889 |
| 70 | CDKN2A | ALVOCIDIB |  | JAX-CKB | 12777976 |
| 71 | CDKN2A | ALECTINIB |  | JAX-CKB | 28476735 |
| 72 | CDKN2A | IMATINIB |  | JAX-CKB | 28514312 |
| 73 | CDKN2A | GSK-461364 |  | JAX-CKB | 25156567 |
| 74 | CDKN2A | TRAMETINIB |  | JAX-CKB | 26343583|27488531 |
|  |  |  |  |  | 22983396 |
| 75 | CDKN2A | PACLITAXEL |  | JAX-CKB | 28514312 |
| 76 | CDKN2A | ABEMACICLIB |  | ClearityFoundationBiomarkers|JAX-CKB|OncoKB | 27217383|26183925 |
| 77 | CDKN2A | PF-00477736 |  | JAX-CKB | 26140595 |
| 78 | CDKN2A | RIGOSERTIB |  | JAX-CKB | 25156567 |
| 79 | CDKN2A | MILCICLIB MALEATE |  | JAX-CKB | 23347136 |
| 80 | CDKN2A | PALBOCICLIB |  | JAX-CKB|CIViC|OncoKB | 26715889|21278246 |
|  |  |  |  |  | 22711607|27488531 |
|  |  |  |  |  | 21871868|24495407 |
|  |  |  |  | 23898052 | 20952405|22983396 |
|  |  |  |  |  | 26528855|25156567 |
|  |  |  |  |  | 26380006|26183925 |
|  |  |  |  |  | 23898052 |
| 81 | CDKN2A | RIBOCICLIB |  | ClearityFoundationBiomarkers|OncoKB |  |
| 82 | CDKN2A | PANITUMUMAB |  | CIViC | 23746666 |
| 83 | ESRRB | DIETHYLSTILBESTROL | antagonist | DTC | 11297507|26408814 |
| 84 | UMOD | CYCLOSPORINE |  | PharmGKB | 28418009 |

**Supplementary figures and figure legends**

**
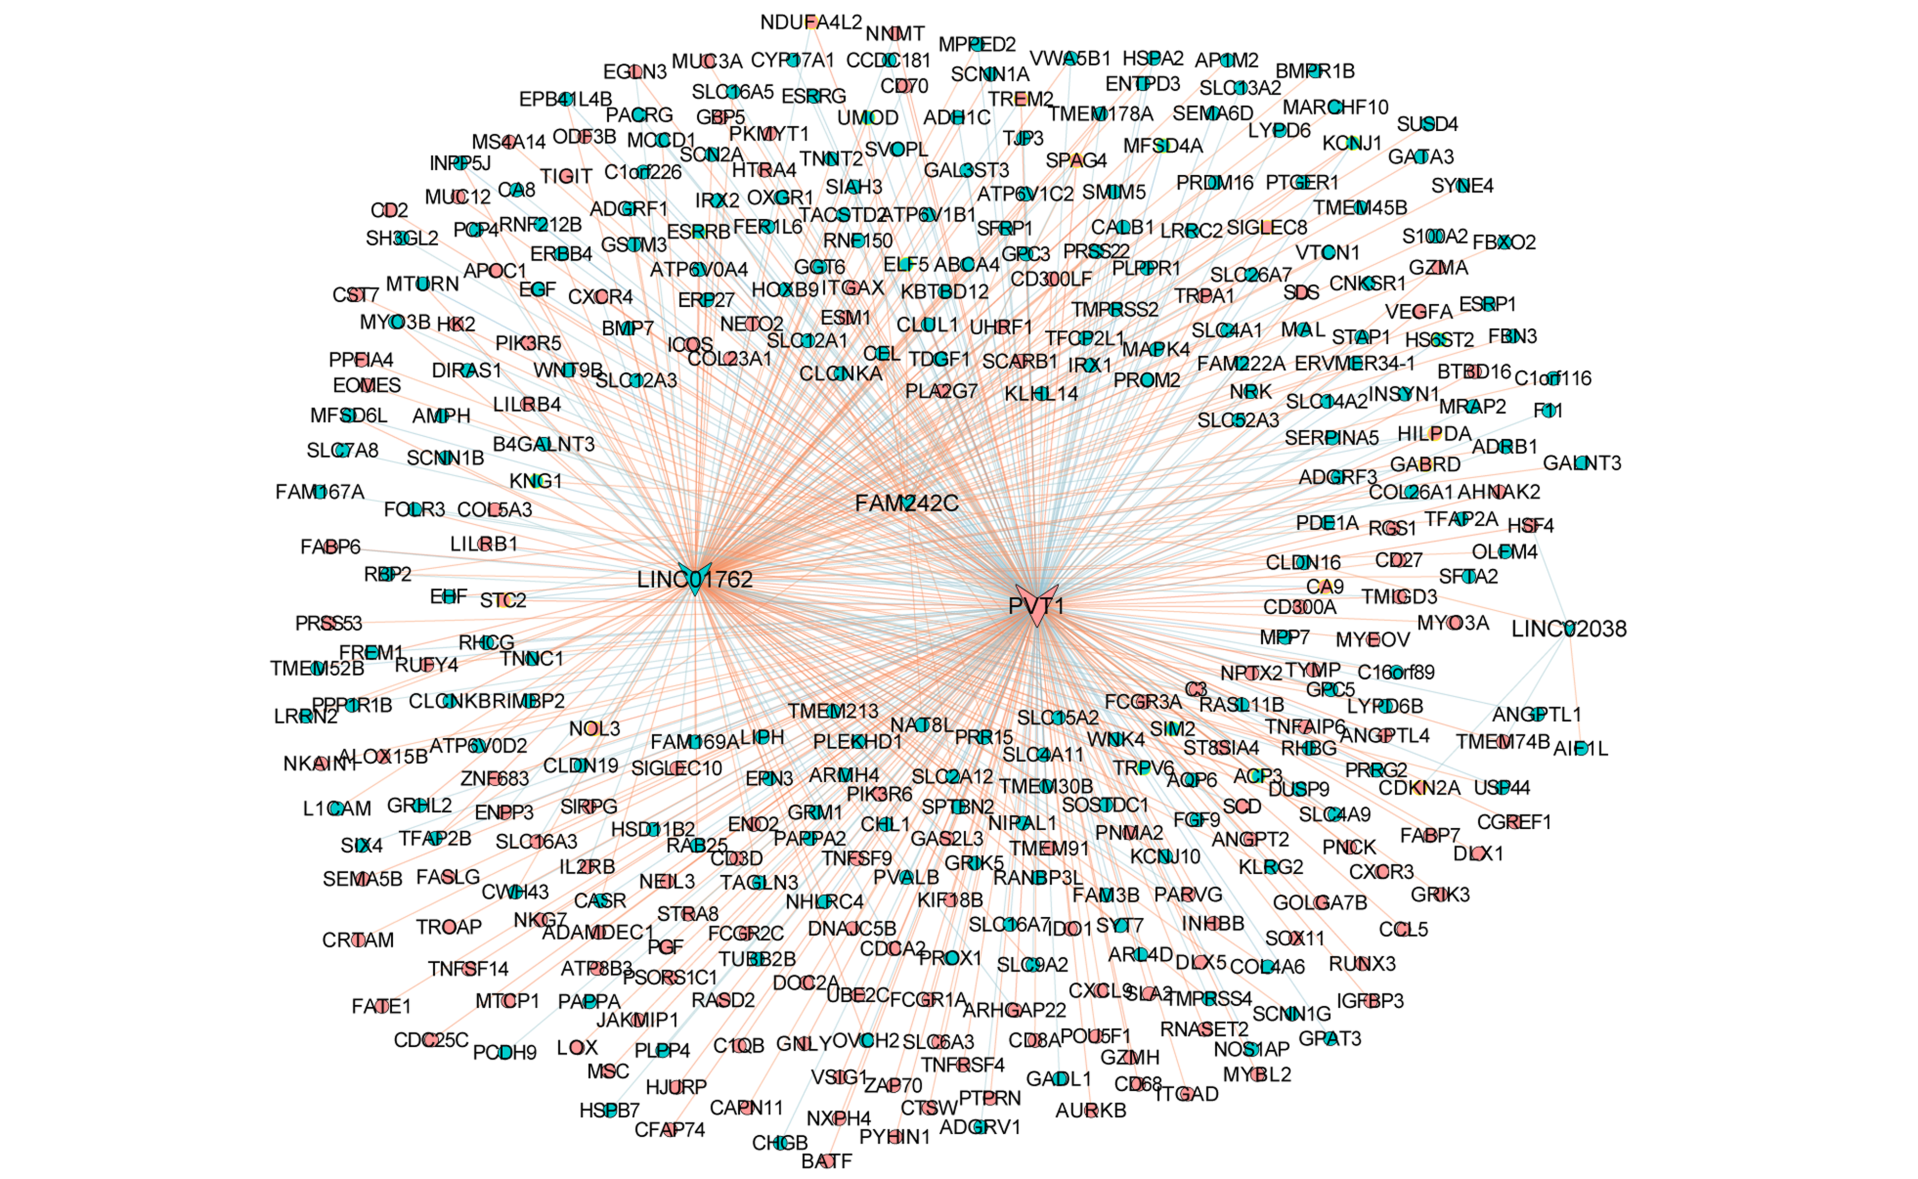
**

**Supplementary Figure 1.** The interacting co-expression network of optimal diagnostic lncRNAs and co-expressed DEmRNAs.
